# Supplementary material for: Boosting electrocatalytic N2 reduction to NH3 on β-FeOOH by fluorine doping
Source: Royal Society of Chemistry journal article supplement (doi:10.1039/c9cc00647h), 2019-01-01
Supplement: c9cc00647h1.pdf [file c9cc00647h1.pdf]

## Electronic Supplementary Information

### Experimental section

**Materials:** Sodium fluoride (NaF), ferric chloride hexahydrate ( $\text{FeCl}_3 \cdot 6\text{H}_2\text{O}$ ), ammonium chloride ( $\text{NH}_4\text{Cl}$ ), anhydrous lithium perchlorate ( $\text{LiClO}_4$ ), hydrazine hydrate ( $\text{N}_2\text{H}_4 \cdot \text{H}_2\text{O}$ ), sodium hypochlorite ( $\text{NaClO}$ ), sodium hydroxide ( $\text{NaOH}$ ), sodium salicylate ( $\text{C}_7\text{H}_5\text{O}_3\text{Na}$ ), ethanol ( $\text{CH}_3\text{CH}_2\text{OH}$ ), and carbon paper were bought from Beijing Chemical Corporation. Para-(dimethylamino) benzaldehyde ( $\text{C}_9\text{H}_{11}\text{NO}$ ), sodium nitroferricyanide (III) dihydrate ( $\text{Na}_2\text{Fe}(\text{CN})_5\text{NO} \cdot 2\text{H}_2\text{O}$ ), and Nafion were purchased from Aladdin Ltd. (Shanghai, China). The water used throughout all experiments was purified through a Millipore system.

**Preparation of  $\beta\text{-FeO}(\text{OH},\text{F})$ :** In the synthesis of typical sample, 8.0 mmol NaF and 16.0 mmol  $\text{FeCl}_3 \cdot 6\text{H}_2\text{O}$  were dissolved in a mixture of 35 mL  $\text{H}_2\text{O}$  and 35 mL ethanol at room temperature. In what follows, the value of  $R_F$  with 0, 0.1, 0.3, 0.5, and 0.7, is used to describe the molar ratio of NaF to  $\text{FeCl}_3 \cdot 6\text{H}_2\text{O}$ . After continuously stirring for 30 min, the solution was transferred to 100 mL of Teflon-lined stainless autoclave. The autoclave was sealed and heated at 120 °C and kept at that temperature for 5 h. The product was washed with deionized water and ethanol for several times, dried in vacuum at 60 °C for 3 h to obtain the  $\beta\text{-FeO}(\text{OH},\text{F})$  nanorod.

**Preparation of  $\beta\text{-FeO}(\text{OH},\text{F})/\text{CP}$ :** Carbon paper (CP) was cleaned via brief sonication with ethanol and water for several times. To prepare the  $\beta\text{-FeO}(\text{OH},\text{F})/\text{CP}$ , 10 mg  $\beta\text{-FeO}(\text{OH},\text{F})$  and 40  $\mu\text{L}$  5 wt% Nafion solution were dispersed in 960  $\mu\text{L}$  water/ethanol ( $V : V = 1 : 3$ ) followed by 1-h sonication to form a homogeneous ink. 20  $\mu\text{L}$  ink was loaded onto a CP ( $1 \times 1 \text{ cm}^2$ ) and dried under ambient condition. The  $\beta\text{-FeO}(\text{OH},\text{F})/\text{CP}$  working electrode was prepared well.

**Characterizations:** TEM images were collected on a HITACHI H-8100 electron microscopy (Hitachi, Tokyo, Japan) operated at 200 kV. XPS measurements were performed on an ESCALABMK II X-ray photoelectron spectrometer using Mg as the exciting source. Raman spectra were obtained by a Renishaw inVia confocal Raman microprobe under 532 nm laser excitation. ICP-MS analysis was performed on ThermoScientific iCAP6300. The absorbance data of spectrophotometer were acquired on SHIMADZU UV-1800 UV-Vis spectrophotometer. A gas chromatograph (SHIMADZU, GC-2014C) equipped with MolSieve 5A column and Ar carrier gas

was used for H<sub>2</sub> quantifications. Gas-phase product was sampled every 1000 s using a gas-tight syringe (Hamilton). <sup>1</sup>H nuclear magnetic resonance (NMR) spectra were collected on a superconducting-magnet NMR spectrometer (Bruker AVANCE III HD 500 MHz) and dimethyl sulphoxide was used as an internal to calibrate the chemical shifts in the spectra.

*Electrochemical measurements:* Electrochemical NRR measurements were performed in a two-compartment cell separated by Nafion membrane using a CHI 660E electrochemical analyzer (CH Instruments, Inc., Shanghai) using a standard three-electrode system using β-FeO(OH,F)/CP as the working electrode, graphite plate as the counter electrode and Ag/AgCl as the reference electrode. The potentials reported in this work were converted to RHE scale via calibration with the following equation:  $E \text{ (vs. RHE)} = E \text{ (vs. Ag/AgCl)} + 0.059 \times \text{pH} + 0.197 \text{ V}$  and the presented current density was normalized to the geometric surface area. For electrochemical N<sub>2</sub> reduction, chrono-amperometry tests were conducted in N<sub>2</sub>-saturated 0.5 M LiClO<sub>4</sub> solution (the LiClO<sub>4</sub> electrolyte was purged with N<sub>2</sub> for 30 min before the measurement).

*Determination of NH<sub>3</sub>:* Concentration of produced NH<sub>3</sub> was spectrophotometrically determined by the indophenol blue method.<sup>1</sup> In detail, 4 mL electrolyte was obtained from the cathodic chamber and mixed with 50 μL oxidizing solution containing NaClO (pCl = 4 ~ 4.9) and NaOH (0.75 M), 500 μL coloring solution containing 0.4 M C<sub>7</sub>H<sub>6</sub>O<sub>3</sub>Na and 0.32 M NaOH, and 50 μL catalyst solution (1 wt% Na<sub>2</sub>[Fe(CN)<sub>5</sub>NO]) for 1 h. Absorbance measurements were performed at λ = 655 nm. The concentration-absorbance curve was calibrated using standard NH<sub>4</sub><sup>+</sup> solution with a series of concentrations. The fitting curve ( $y = 0.363x + 0.013$ ,  $R^2 = 0.999$ ) shows good linear relation of absorbance value with NH<sub>4</sub><sup>+</sup> concentration.

*Determination of N<sub>2</sub>H<sub>4</sub>:* The N<sub>2</sub>H<sub>4</sub> possibly was estimated by the method of Watt and Chrisp.<sup>2</sup> A mixed solution of 5.99 g C<sub>9</sub>H<sub>11</sub>NO, 30 mL concentrated HCl and 300 mL ethanol was used as a color reagent. Calibration curve was plotted as follow: firstly, preparing a series of N<sub>2</sub>H<sub>4</sub> solutions of known concentration as standards; secondly, adding 5 mL color reagent to above N<sub>2</sub>H<sub>4</sub> solution, separately, and standing 20 min at room temperature; finally, the absorbance of the resulting solution was measured at 460 nm. The fitting curve shows good linear relation of absorbance with N<sub>2</sub>H<sub>4</sub>·H<sub>2</sub>O

concentration ( $y = 0.595x + 0.034$ ,  $R^2 = 0.999$ ) by three times independent calibrations.

*Determination of FE and  $V_{NH_3}$ :*  $NH_3$  formation rate was calculated using the following equation:

$$NH_3 \text{ yields} = [NH_4^+] \times V / (m_{cat.} \times t)$$

FE was calculated according to following equation:

$$FE = 3 \times F \times [NH_4^+] \times V / (18 \times Q)$$

Where  $[NH_4^+]$  is the measured  $NH_4^+$  concentration;  $V$  is the volume of the cathodic reaction electrolyte;  $t$  is the potential applied time;  $m_{cat.}$  is the loaded quality of catalyst;  $F$  is the Faraday constant; and  $Q$  is the quantity of charge in Coulombs.

*Computational details:* First-principles density functional theory (DFT) calculations were performed with the generalized gradient approximation (GGA)<sup>3</sup> in the form of the Perdew, Burke, and Ernzerhof (PBE)<sup>4</sup> exchange-correlation functional, as implemented in the Dmol<sup>3</sup> package.<sup>5</sup> A six atom layers  $\beta$ -FeOOH surface was modeled for F-substitution with 20 Å vacuum space to avoid the interaction form nearby layers. Layers 1 to 3 are surface layers, and layers 4 to 6 are central layers. Both one OH group from surface and internal of  $\beta$ -FeOOH was replaced by F atom, named as  $\beta$ -FeO(OH,sF) and  $\beta$ -FeO(OH,iF), respectively. Structural relaxation was performed until the convergence criteria for energy were set to be  $10^{-5}$  eV, and  $0.002 \text{ Ha } \text{\AA}^{-1}$  was adopted for the total energy calculations. The  $N_2$  dissociation minimum energy path (MEP) was obtained by LST/QST tools in DMol<sup>3</sup> code.<sup>6</sup> The Brillouin zone integration was performed with  $1 \times 4 \times 1$   $\Gamma$ -centred Monkhorst-Pack k-point meshes in geometry optimization. Frequencies of each complex were calculated after geometry optimization, and the free energy was obtained as follows:

$$\Delta G = \Delta E + \Delta ZPE - T\Delta S + \Delta G_u + \Delta G_{pH}$$

where  $\Delta E$ ,  $\Delta ZPE$  and  $\Delta S$  represent the difference in DFT-calculated total energy change, zero-point energy and the change in entropy between the products and reactants, respectively.  $T$  represents the temperature (298.15 K).  $\Delta G_u = -neU$ , where  $n$  represents the number of transferred charge, and  $U$  represents the electrode potential with respect to the normal hydrogen electrode.  $\Delta G_{pH}$  represents the correction  $H^+$  free energy by the concentration, which can be calculated through  $\Delta G_{pH} = 0.059 \times pH$

(the value of pH is assumed to be zero in this work). The N<sub>2</sub> adsorption energy is defined as:  $E_{\text{ads}} = E_{\text{N}_2/\text{substrate}} - E_{\text{substrate}} - E_{\text{N}_2}$ .

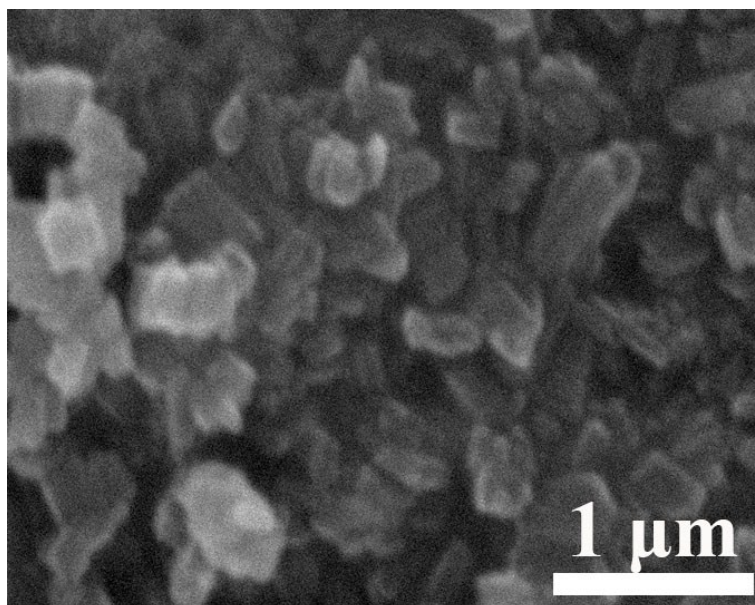

**Fig. S1.** SEM image of  $\beta$ -FeO(OH,F).

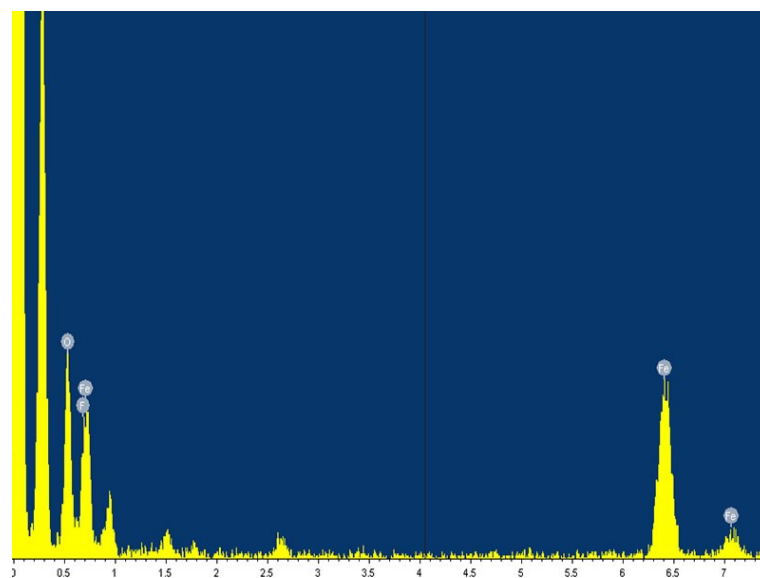

**Fig. S2.** EDX spectrum of  $\beta$ -FeO(OH,F).

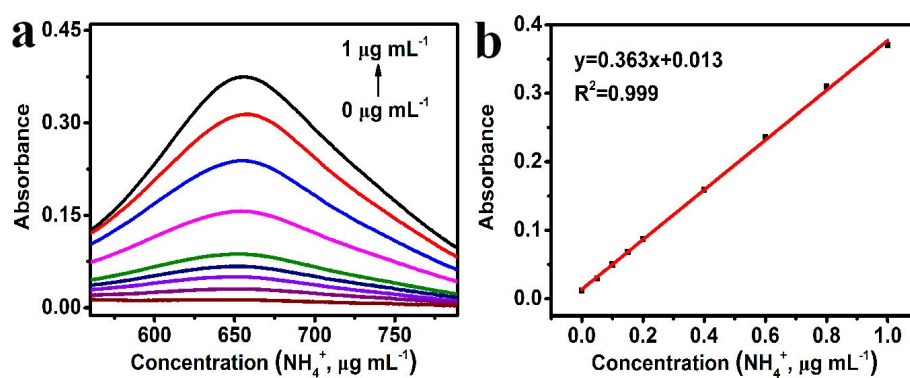

**Fig. S3.** (a) UV-Vis absorption spectra of indophenol assays with  $\text{NH}_4^+$  concentrations after incubated for 1 h at room temperature. (b) Calibration curve used for calculation of  $\text{NH}_4^+$  concentrations.

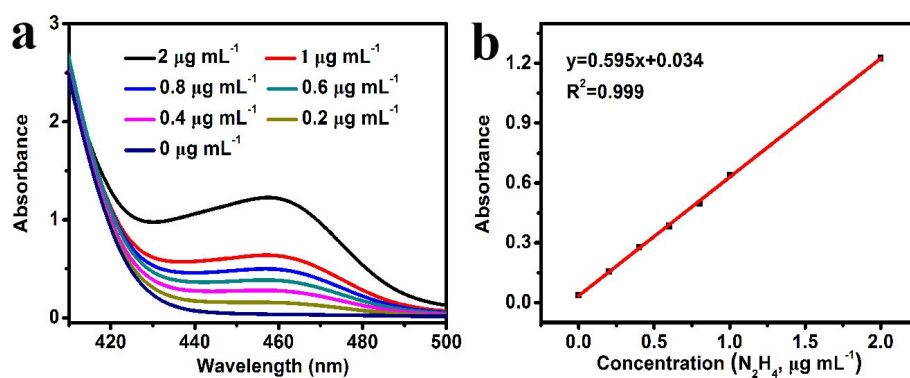

**Fig. S4.** (a) UV-Vis absorption spectra of  $\text{N}_2\text{H}_4$  concentrations after incubated for 20 min at room temperature. (b) Calibration curve used for calculation of  $\text{N}_2\text{H}_4$  concentrations.



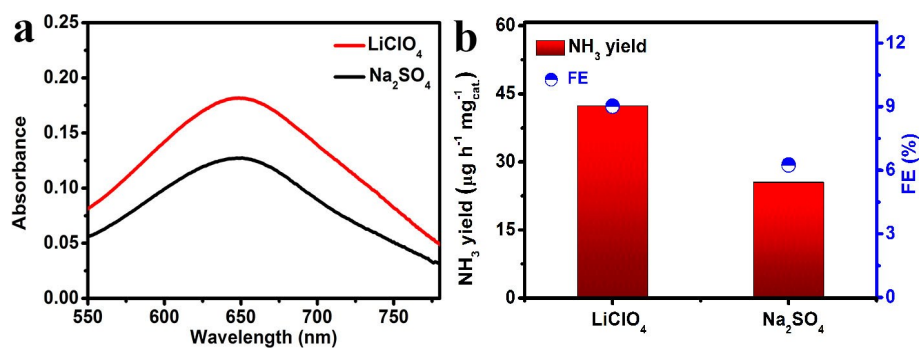

**Fig. S5.** (a) UV-Vis absorption spectra of different electrolyte stained with indophenol indicator after charging at  $-0.60$  V. (b)  $\text{NH}_3$  yields and FEs for  $\beta\text{-FeO(OH,F)}$  at  $-0.60$  V in  $0.1$  M  $\text{Na}_2\text{SO}_4$  and  $0.5$  M  $\text{LiClO}_4$ .

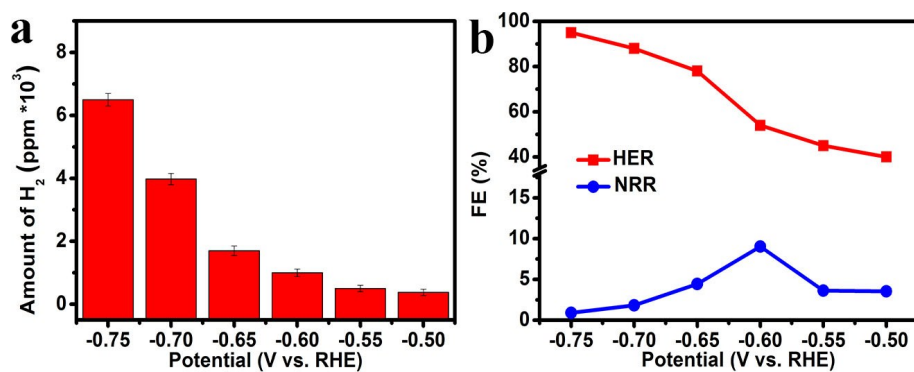

**Fig. S6.** (a) Amounts of  $H_2$  from gas chromatography (GC) data of the gas from the headspace of the cell for NRR on the  $\beta$ -FeO(OH,F) in  $N_2$ -saturated 0.5 M  $LiClO_4$  at various potentials. (b) The calculated FEs of HER and NRR.

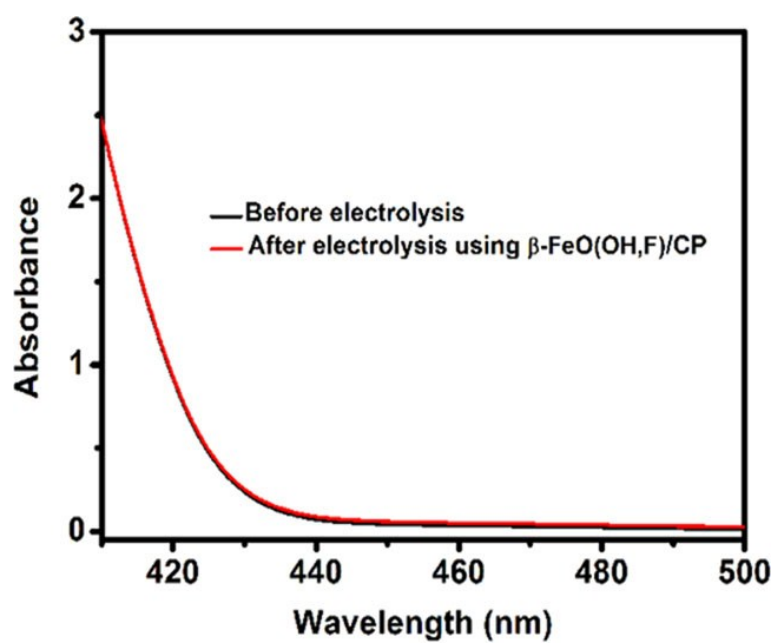

**Fig. S7.** UV-Vis absorption spectra of electrolytes stained with para-(dimethylamino) benzaldehyde indicator before and after 2 h electrolysis.

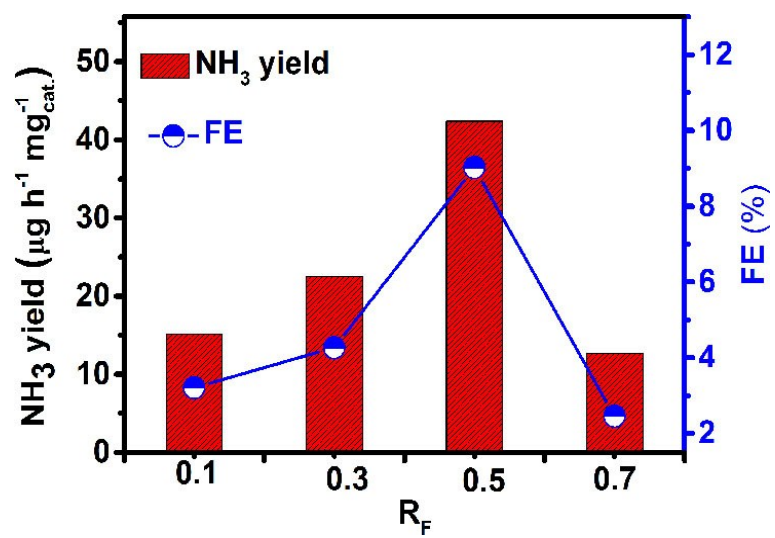

**Fig. S8.**  $\text{NH}_3$  yields and FEs of  $\beta\text{-FeO}(\text{OH},\text{F})$  with various  $R_F$  values at  $-0.60$  V.

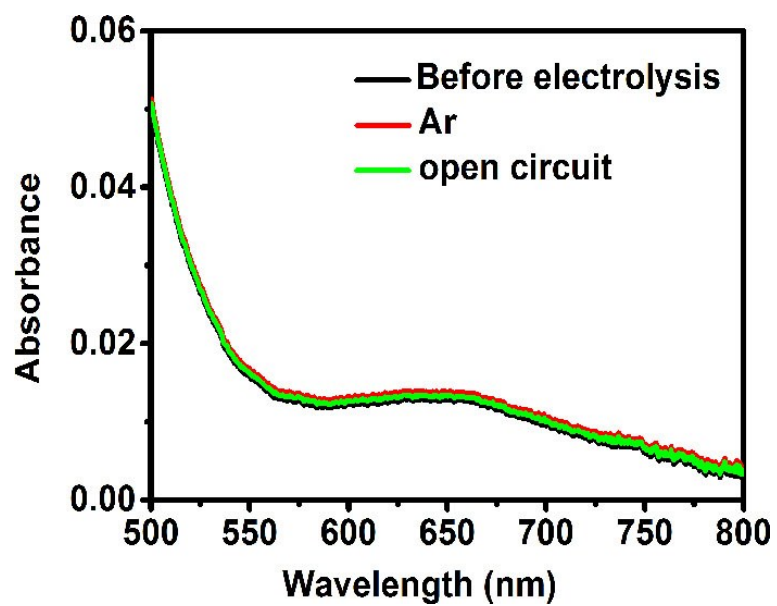

**Fig. S9.** UV-Vis absorption spectra of the electrolyte stained with indophenol indicator after charging at  $-0.60$  V for 2 h under different electrochemical conditions.

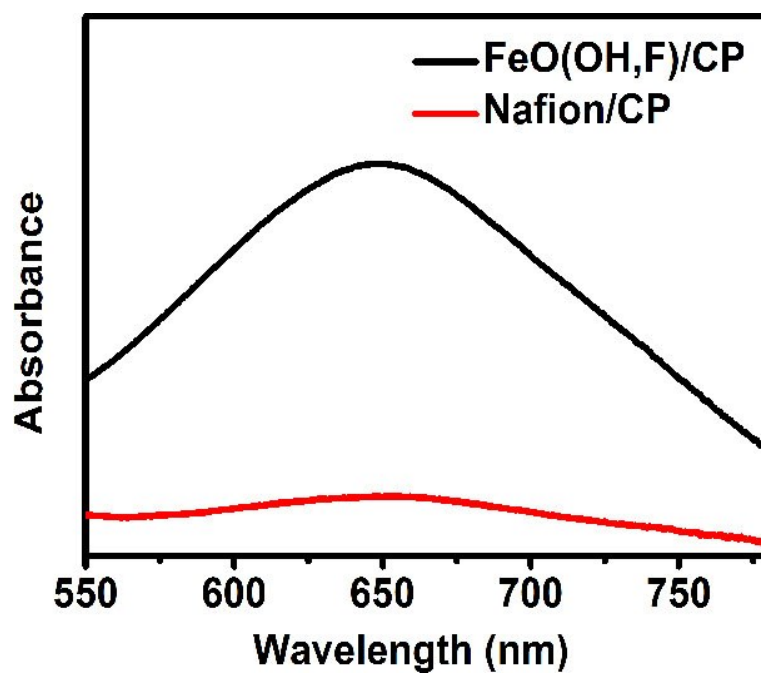

**Fig. S10.** UV-Vis absorption spectra of the electrolyte stained with indophenol indicator after charging at  $-0.60$  V for 2 h using Nafion dispersed carbon paper.

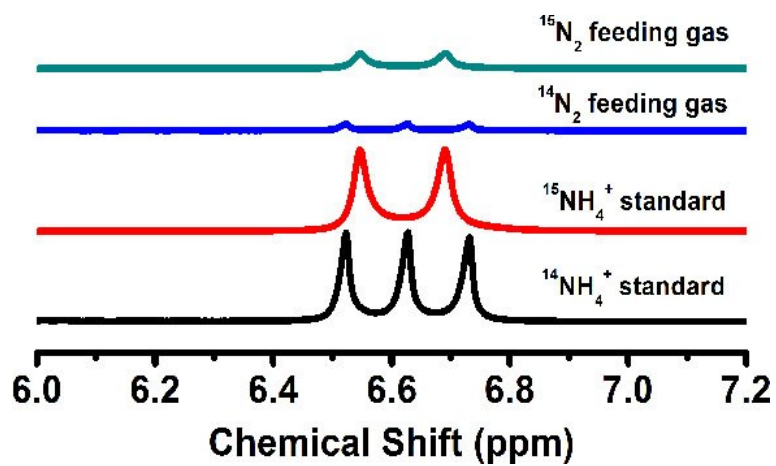

**Fig. S11.**  $^{15}\text{N}$  isotope labeling experiment.  $^1\text{H}$  NMR spectra for the post-electrolysis 0.5 M  $\text{LiClO}_4$  electrolytes with  $^{15}\text{N}_2$ ,  $^{14}\text{N}_2$  as the feeding gas. Also shown are the spectra for  $^{15}\text{NH}_4^+$  and  $^{14}\text{NH}_4^+$  standard samples.

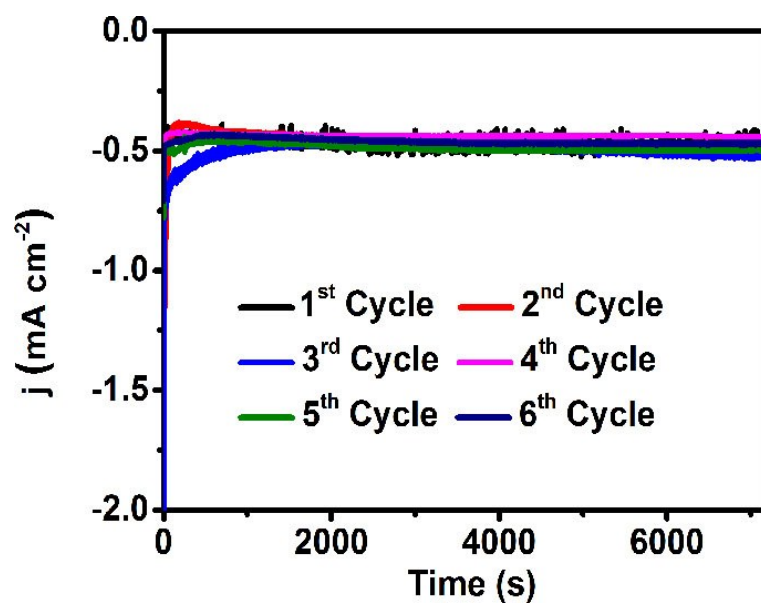

**Fig. S12.** Time-dependent current density curves of  $\beta\text{-FeO(OH,F)/CP}$  at  $-0.60\text{ V}$  for 6 consecutive cycles.



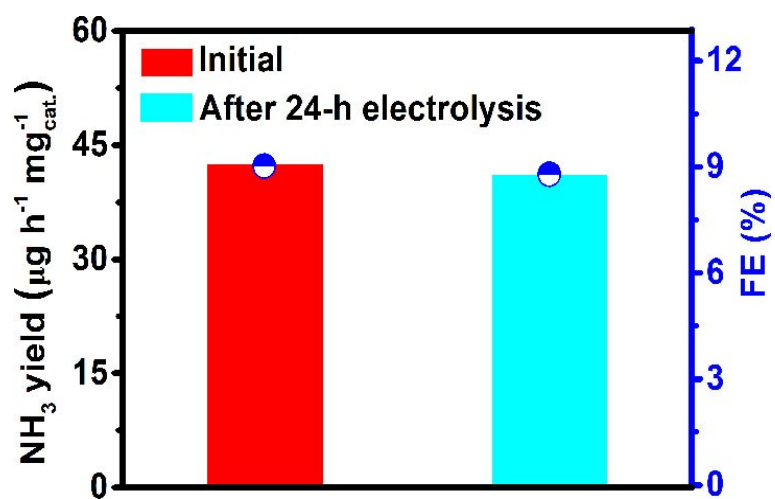

**Fig. S13.** NH<sub>3</sub> yields and FEs after charging at  $-0.60$  V for 2 and 24 h.

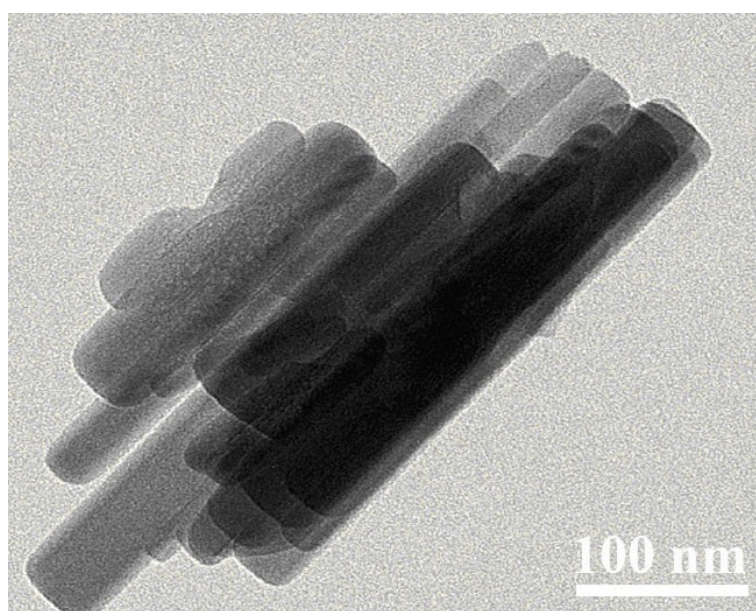

**Fig. S14.** TEM image of  $\beta$ -FeO(OH,F) after stability test.

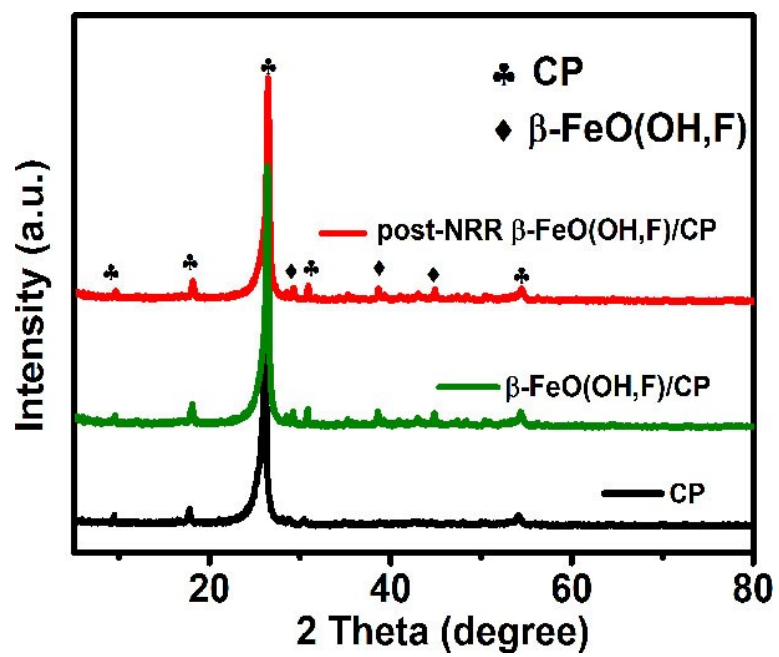

**Fig. S15.** XRD patterns of bare CP,  $\beta$ -FeO(OH,F)/CP, and post-NRR  $\beta$ -FeO(OH,F)/CP.

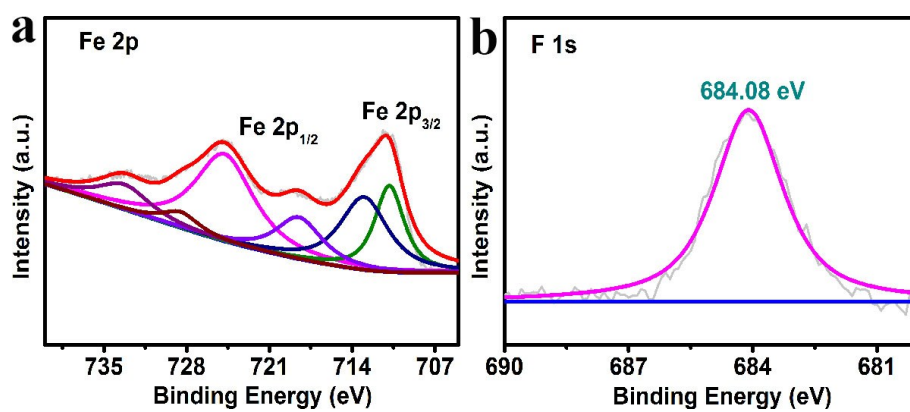

**Fig. S16.** XPS spectra of post-NRR  $\beta$ -FeO(OH,F) in (a) Fe 2p and (b) F 1s regions.

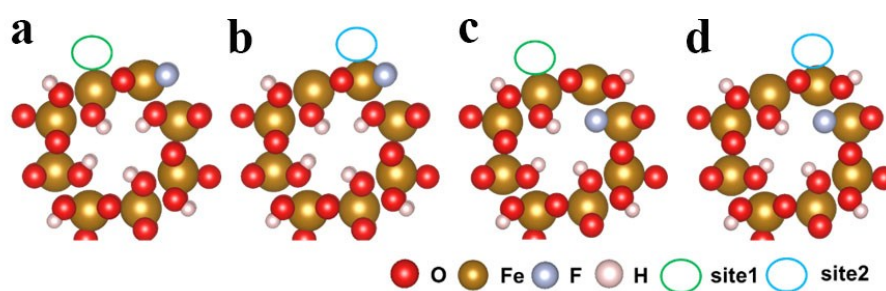

**Fig. S17.** Structures of (a)  $\beta$ -FeO(OH,sF-1), (b)  $\beta$ -FeO(OH,sF-2), (c)  $\beta$ -FeO(OH,iF-1), and (d)  $\beta$ -FeO(OH,iF-2).

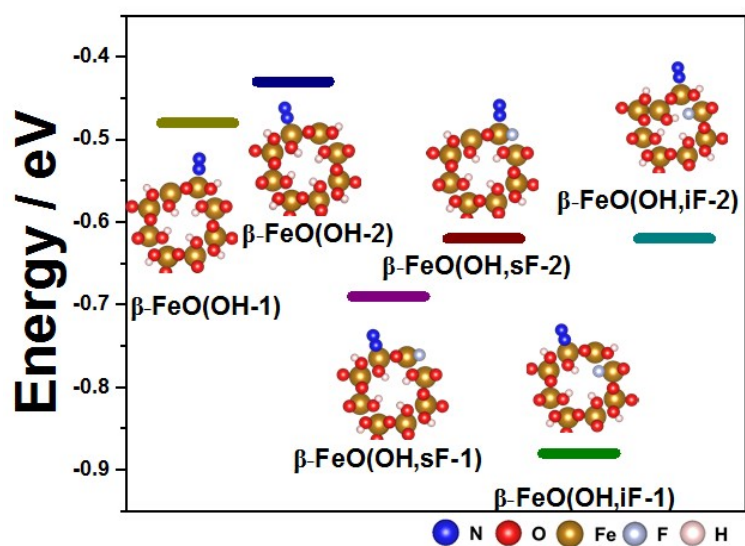

**Fig. S18.** Structures and calculated adsorption energies of  $N_2$  adsorption on (200) surface of  $\beta$ -FeO(OH-1),  $\beta$ -FeO(OH-2),  $\beta$ -FeO(OH,sF-1),  $\beta$ -FeO(OH,sF-2),  $\beta$ -FeO(OH,iF-1), and  $\beta$ -FeO(OH,iF-2) for end-on configurations.

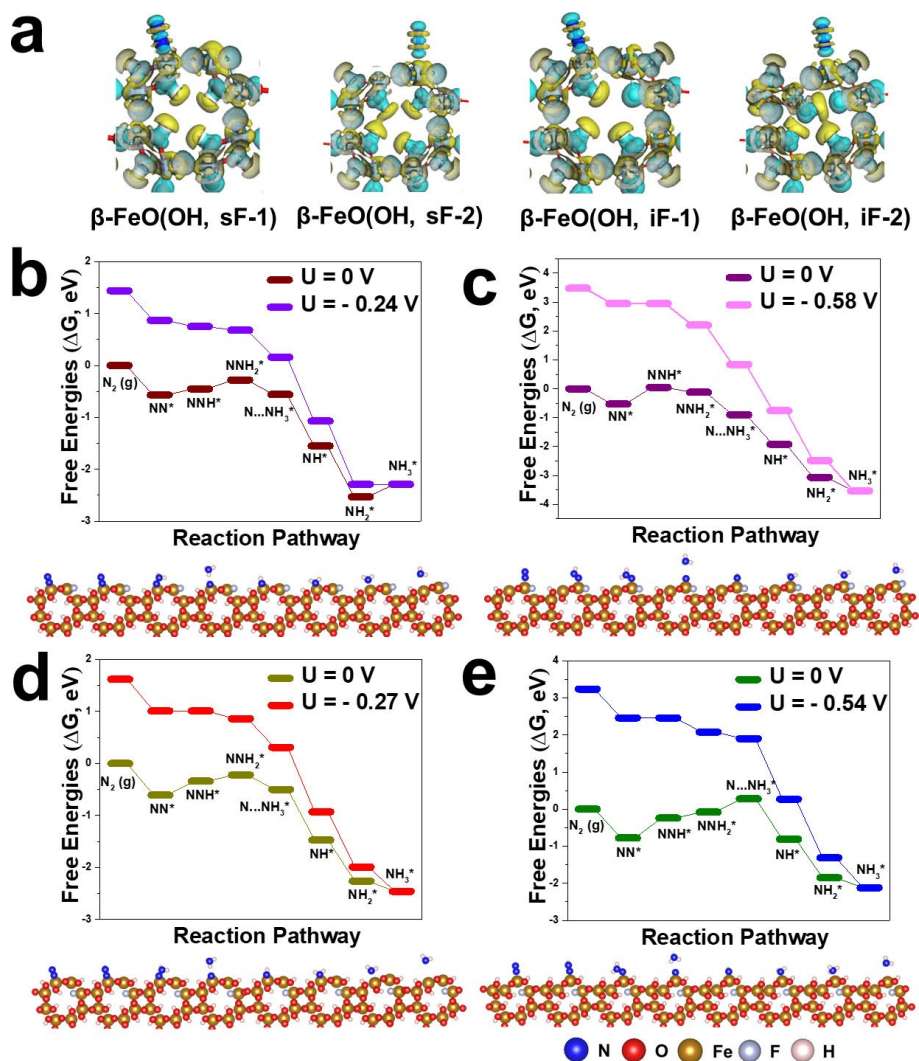

**Fig. S19.** (a) The optimized end-on configurations with the color-mapped charge density difference of  $N_2$  adsorption on the (200) surface of  $\beta$ -FeO(OH,sF-1),  $\beta$ -FeO(OH,sF-2),  $\beta$ -FeO(OH,iF-1) and  $\beta$ -FeO(OH,iF-2). Yellow and cyan colors represent charge accumulation and charge depletion zones, respectively, with a isosurface value of  $0.03 \text{ eV}/\text{\AA}^3$ . Free energy diagram and the optimized structures for the NRR at zero and applied potential (limiting potential) through distal mechanisms on (200) surface of (b)  $\beta$ -FeO(OH,sF-1), (c)  $\beta$ -FeO(OH,sF-2), (d)  $\beta$ -FeO(OH,iF-1), and (e)  $\beta$ -FeO(OH,iF-2).

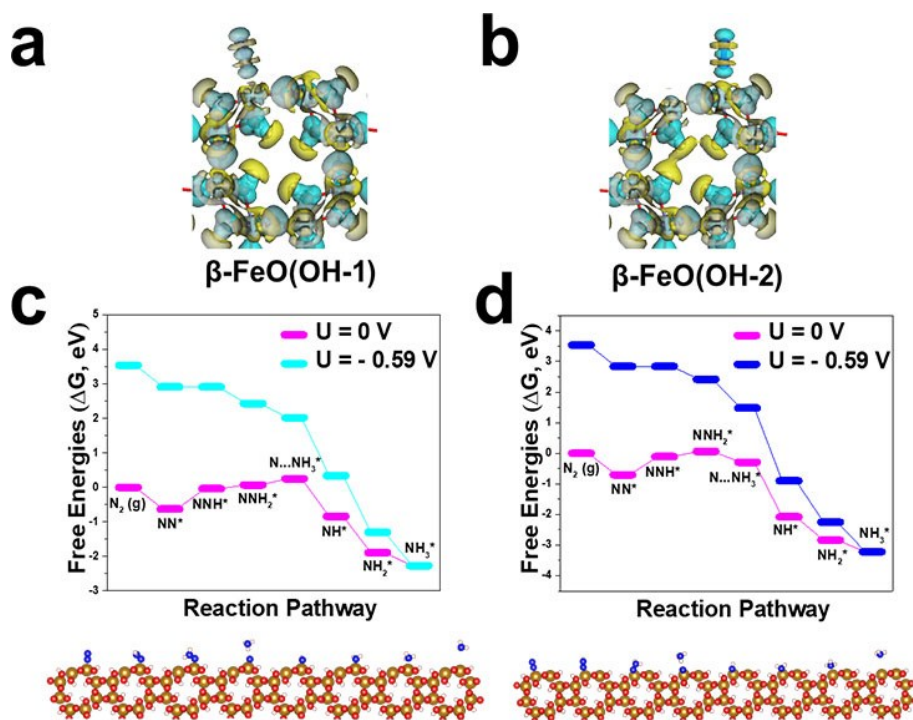

**Fig. S20.** The optimized end-on configurations with the color-mapped charge density difference of  $N_2$  adsorption on the (200) surface of (a)  $\beta$ -FeO(OH-1) and (b)  $\beta$ -FeO(OH-2). Yellow and cyan colors represent charge accumulation and charge depletion zones, respectively, with a isosurface value of  $0.03 \text{ eV}/\text{\AA}^3$ . Free energy diagram and the optimized structures for the NRR at zero and applied potential (limiting potential) through distal mechanisms on (200) surface of (c)  $\beta$ -FeO(OH-1) and (d)  $\beta$ -FeO(OH-2).



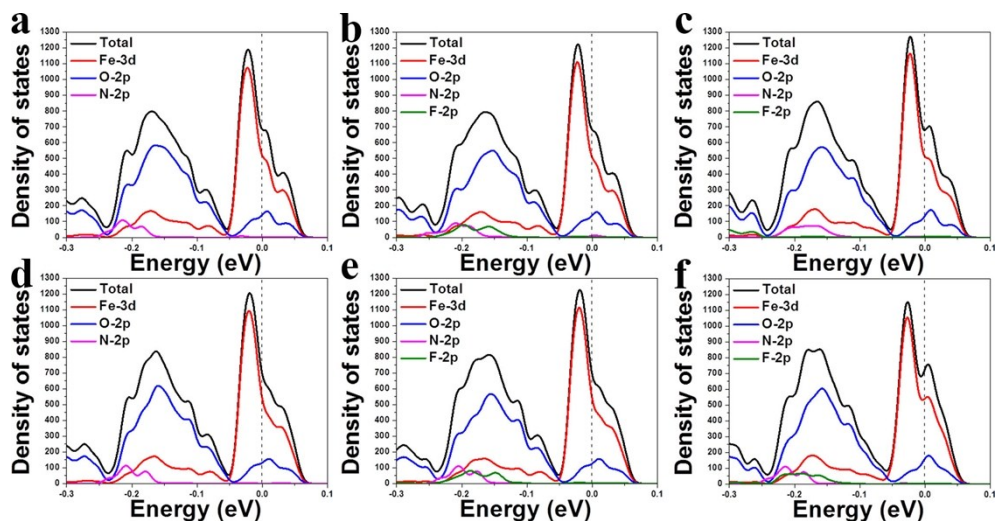

**Fig. S21.** Density of states of the N<sub>2</sub> adsorption on (200) surface of (a)  $\beta$ -FeO(OH-1), (b)  $\beta$ -FeO(OH,sF-1), (c)  $\beta$ -FeO(OH,iF-1), (d)  $\beta$ -FeO(OH-2), (e)  $\beta$ -FeO(OH,sF-2), and (f)  $\beta$ -FeO(OH,iF-2) for end-on configurations. The vertical dashed lines denote the Fermi energy.

**Table S1.** Comparison of electrocatalytic N<sub>2</sub> reduction performance of  $\beta$ -FeO(OH,F) with all Fe-based oxides and other transition metal oxides under ambient reaction conditions in aqueous media.

| Catalyst                                                         | Electrolyte                           | NH <sub>3</sub> yield                                       | FE(%) | Ref.      |
|------------------------------------------------------------------|---------------------------------------|-------------------------------------------------------------|-------|-----------|
| $\beta$ -FeO(OH,F)                                               | 0.5 M LiClO <sub>4</sub>              | 42.38 $\mu\text{g h}^{-1} \text{mg}^{-1}_{\text{cat.}}$     | 9.02  | This work |
| Fe <sub>2</sub> O <sub>3</sub> -CNT                              | KHCO <sub>3</sub>                     | 0.22 $\mu\text{g h}^{-1} \text{cm}^{-2}$                    | 0.15  | 7         |
| 30%Fe <sub>2</sub> O <sub>3</sub> -CNT                           | 0.5 M KOH                             | 0.52 $\mu\text{g} \cdot \text{h}^{-1} \cdot \text{cm}^{-2}$ | 0.164 | 8         |
| Fe <sub>2</sub> O <sub>3</sub> nanorod                           | 0.1 M Na <sub>2</sub> SO <sub>4</sub> | 15.9 $\mu\text{g h}^{-1} \text{mg}^{-1}_{\text{cat.}}$      | 0.94  | 9         |
| $\gamma$ -Fe <sub>2</sub> O <sub>3</sub>                         | 0.1 M KOH                             | 0.212 $\mu\text{g h}^{-1} \text{mg}^{-1}_{\text{cat.}}$     | 1.9   | 10        |
| Fe <sub>3</sub> O <sub>4</sub> /Ti                               | 0.1 M Na <sub>2</sub> SO <sub>4</sub> | 3.63 $\mu\text{g h}^{-1} \text{cm}^{-2}$                    | 2.6   | 11        |
| o-Fe <sub>2</sub> O <sub>3</sub> -air                            | 0.1 M KOH                             | 0.46 $\mu\text{g} \cdot \text{h}^{-1} \cdot \text{cm}^{-2}$ | 6.04  | 12        |
| $\beta$ -FeOOH                                                   | 0.5 M LiClO <sub>4</sub>              | 23.32 $\mu\text{g h}^{-1} \text{mg}^{-1}_{\text{cat.}}$     | 6.7   | 13        |
| Fe/Fe <sub>3</sub> O <sub>4</sub>                                | 0.1 M PBS                             | 0.19 $\mu\text{g h}^{-1} \text{cm}^{-2}$                    | 8.29  | 14        |
| MoO <sub>3</sub>                                                 | 0.1 M HCl                             | 29.43 $\mu\text{g h}^{-1} \text{mg}^{-1}_{\text{cat.}}$     | 1.9   | 15        |
| TiO <sub>2</sub>                                                 | 0.1 M Na <sub>2</sub> SO <sub>4</sub> | 0.56 $\mu\text{g} \cdot \text{h}^{-1} \cdot \text{cm}^{-2}$ | 2.5   | 16        |
| Mn <sub>3</sub> O <sub>4</sub>                                   | 0.1 M Na <sub>2</sub> SO <sub>4</sub> | 11.6 $\mu\text{g h}^{-1} \text{mg}^{-1}_{\text{cat.}}$      | 3.0   | 17        |
| VO <sub>2</sub> hollow microsphere                               | 0.1 M Na <sub>2</sub> SO <sub>4</sub> | 14.85 $\mu\text{g h}^{-1} \text{mg}^{-1}_{\text{cat.}}$     | 3.97  | 18        |
| hollow Cr <sub>2</sub> O <sub>3</sub>                            | 0.1 M Na <sub>2</sub> SO <sub>4</sub> | 25.3 $\mu\text{g h}^{-1} \text{mg}^{-1}_{\text{cat.}}$      | 6.78  | 19        |
| Bi <sub>4</sub> V <sub>2</sub> O <sub>11</sub> /CeO <sub>2</sub> | 0.1 M HCl                             | 23.21 $\text{mg h}^{-1} \text{mg}^{-1}_{\text{cat.}}$       | 10.16 | 20        |

## References

- 1 D. Zhu, L. Zhang, R. E. Ruther and R. J. Hamers, *Nat. Mater.*, 2013, **12**, 836–841.
- 2 G. W. Watt and J. D. Chrisp, *Anal. Chem.*, 1952, **24**, 2006–2008.
- 3 B. Delley, *J. Chem. Phys.*, 1990, **92**, 508–517.
- 4 J. P. Perdew, K. Burke and M. Ernzerhof, *Phys. Rev. Lett.*, 1996, **77**, 3865.
- 5 B. Delley, *J. Chem. Phys.*, 2000, **113**, 7756–7764.
- 6 N. Govind, M. Petersen, G. Fitzgerald, D. King-Smith and J. Andzelm, *Comp. Mater. Sci.*, 2003, **28**, 250–258.
- 7 S. Chen, S. Perathoner, C. Ampelli, C. Mebrahtu, D. Su and G. Centi, *Angew. Chem., Int. Ed.*, 2017, **56**, 2699–2703.
- 8 S. Chen, S. Perathoner, C. Ampelli, C. Mebrahtu, D. Su and G. Centi, *ACS Sustainable Chem. Eng.*, 2017, **5**, 7393–7400.
- 9 X. Xiang, Z. Wang, X. Shi, M. Fan and X. Sun, *ChemCatChem.*, 2018, **10**, 4530–4535.
- 10 J. Kong, A. Lim, C. Yoon, J. H. Jang, H. C. Ham, J. Han, S. Nam, D. Kim, Y. E. Sung, J. Choi and H. S. Park, *ACS Sustainable Chem. Eng.*, 2017, **5**, 10986–10995.
- 11 Q. Liu, X. Zhang, B. Zhang, Y. Luo, G. Cui, F. Xie and X. Sun, *Nanoscale*, 2018, **10**, 14386–14389.
- 12 X. Cui, C. Tang, X. Liu, C. Wang, W. Ma and Q. Zhang, *Chem. Eur. J.*, 2018, **24**, 18494–18501.
- 13 X. Zhu, Z. Liu, Q. Liu, Y. Luo, X. Shi, A. M. Asiri, Y. Wu and X. Sun, *Chem. Commun.*, 2018, **54**, 11332–11335.
- 14 L. Hu, A. Khaniya, J. Wang, G. Chen, W. E. Kaden and X. Feng, *ACS Catal.*, 2018, **8**, 9312–9319.
- 15 J. Han, X. Ji, X. Ren, G. Cui, L. Li, F. Xie, H. Wang, B. Li and X. Sun, *J. Mater. Chem. A*, 2018, **6**, 12974–12977.
- 16 R. Zhang, X. Ren, X. Shi, F. Xie, B. Zheng, X. Guo and X. Sun, *ACS Appl. Mater. Interfaces*, 2018, **10**, 28251–28255.
- 17 X. Wu, L. Xia, Y. Wang, W. Lu, Q. Liu, X. Shi and X. Sun, *Small*, 2018, **14**, 1803111.

- 18 R. Zhang, H. Guo, L. Yang, Y. Wang, Z. Niu, H. Huang, H. Chen, L. Xia, T. Li, X. Shi, X. Sun, B. Li and Q. Liu, *ChemElectroChem*, 2019, **6**, 1014–1018.
- 19 Y. Zhang, W. Qiu, Y. Ma, Y. Luo, Z. Tian, G. Cui, F. Xie, L. Chen, T. Li and X. Sun, *ACS Catal.*, 2018, **8**, 8540–8544.
- 20 C. Lv, C. Yan, G. Chen, Y. Ding, J. Sun, Y. Zhou and G. Yu, *Angew. Chem., Int. Ed.*, 2018, **130**, 6181–6184.
